# Supplementary material for: Sterol regulatory element binding transcription factor 1 promotes proliferation and migration in head and neck squamous cell carcinoma
Source: PeerJ journal article supplement (doi:10.7717/peerj.15203), 2023-04-17
Supplement: FigS1.pdf [file FigS1.pdf]

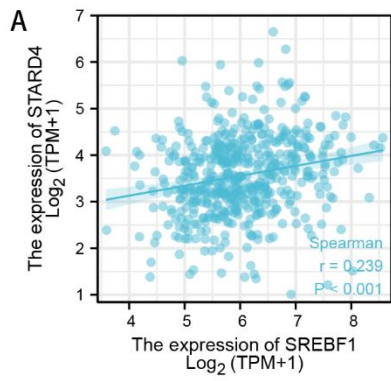

Supplementary Figure 1

Supplementary Figure 1. Correlation analysis of SREBF1 and STARD4 in the HNSC cohort of TCGA database
